# Supplementary material
Source: publisher figshare collection journal article supplement (https://asha.figshare.com/articles/dataset/_/7268651)
Supplement: Supplementary file 1 [file 1]

**Supplemental Material S2.** Donal's posttest pictographic notes that resulted.

|                          |                                                                                                                                                                                                                                                                                                         |
|--------------------------|---------------------------------------------------------------------------------------------------------------------------------------------------------------------------------------------------------------------------------------------------------------------------------------------------------|
| Historical Time & Area   | 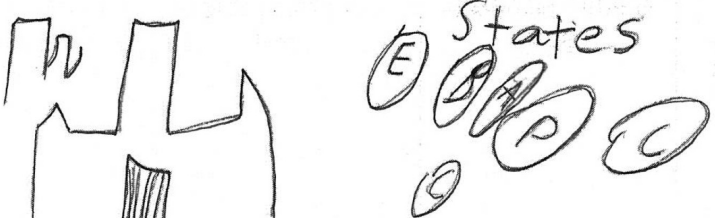 <p>A hand-drawn sketch of a castle with three towers and a central entrance. To the right of the castle are several circles, some containing letters. The word "States" is written in cursive above the circles.</p> |
| Events & Activities      |  <p>A hand-drawn sketch of two stick figures. One figure is on the left, and the other is on the right. They appear to be walking or standing on a flat surface.</p>                                                   |
| Shelter & Transportation |  <p>A hand-drawn sketch of a city skyline with several rectangular buildings of varying heights. The word "City" is written in cursive above the buildings.</p>                                                       |
| Preferred Foods          |  <p>A hand-drawn sketch of food items, including what looks like a pizza, a sandwich, and some other food shapes.</p>                                                                                                |
| Special Features         |  <p>A hand-drawn sketch of a giraffe standing next to some vertical lines that represent grass or a fence.</p>                                                                                                       |
