# Supplementary material
Source: publisher figshare collection journal article supplement (https://asha.figshare.com/articles/dataset/_/7268651)
Supplement: Supplementary file 2 [file 1]

**Supplemental Material S4.** Tyrone's posttest written and pictographic notes.

Topic The Apache Nation in Arizona  
people

|                          |                                                                                                                              |
|--------------------------|------------------------------------------------------------------------------------------------------------------------------|
| Historical Time & Area   | <ul style="list-style-type: none"> <li>• least then 100 years</li> <li>• farm</li> <li>• ranches</li> <li>• towns</li> </ul> |
| Events & Activities      | <ul style="list-style-type: none"> <li>• warfare</li> <li>• United States won</li> </ul>                                     |
| Shelter & Transportation | 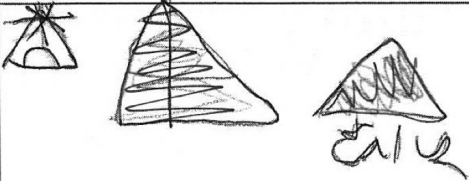                                           |
| Preferred Foods          |                                                                                                                              |
| Special Features         | <ul style="list-style-type: none"> <li>• the first time in AZ, N, TX, South CO,</li> </ul>                                   |

I hope you like it.
