# Supplementary material
Source: publisher figshare collection journal article supplement (https://asha.figshare.com/articles/dataset/_/7268651)
Supplement: Supplementary file 3 [file 1]

**Supplemental Material S1.** Donal's pretest written notes.

|                          |                              |
|--------------------------|------------------------------|
| Historical Time & Area   | horsemen, fearsome fighters, |
| Events & Activities      | na-dee<br>Hunting            |
| Shelter & Transportation | teepees, wickiups and hogans |
| Preferred Foods          | roots and berries            |
| Special Features         | Apache                       |
