# Supplementary material
Source: publisher figshare collection journal article supplement (https://asha.figshare.com/articles/dataset/_/7268651)
Supplement: Supplementary file 4 [file 1]

**Supplemental Material S3.** Tyrone's pretest written notes.

Topic The Inca Empire

|                          |                                                                                                                 |
|--------------------------|-----------------------------------------------------------------------------------------------------------------|
| Historical Time & Area   |                                                                                                                 |
| Events & Activities      |                                                                                                                 |
| Shelter & Transportation | The shelter is the Inca empire.                                                                                 |
| Preferred Foods          | potatoes, corn and chili pepper                                                                                 |
| Special Features         | The Inca Empire covered a lot of city like Columbia, Peru, and parts Ecuador, Bolive, Argentina Chile, Colombia |
